# Supplementary material for: Parental and professional perceptions of informed consent and participation in a time-critical neonatal trial: a mixed-methods study in India, Sri Lanka and Bangladesh
Source: HighWire-hosted journal article supplement (doi:10.1136/bmjgh-2021-005757), 2021-05-01
Supplement: bmjgh-2021-005757supp002_data_supplement.pdf [file bmjgh-2021-005757supp002_data_supplement.pdf]

## Supplementary file- annexure 2

## (A) Coding framework for parent interviews

| Root nodes                                  | Parent nodes                   | Child nodes                                            |
|---------------------------------------------|--------------------------------|--------------------------------------------------------|
| Trial participation                         | Delivery complications         | Prolonged labour                                       |
|                                             |                                | Forceps delivery                                       |
|                                             |                                | Delayed cry of baby                                    |
|                                             | Decision making                | Emotional distress                                     |
|                                             |                                | Cost concerns                                          |
|                                             |                                | Trust in doctors                                       |
|                                             |                                | Time constraints                                       |
|                                             |                                | Level of education                                     |
|                                             | Parents understanding of trial | Additional treatment                                   |
|                                             |                                | Treatment using a machine                              |
|                                             |                                | Treatment from abroad                                  |
|                                             | Follow up                      | Doctors explained what to expect                       |
| Unsure about Bayley test details and result |                                |                                                        |
| Views on trial                              | Positive outcome               | Baby became better because of the treatment (cooling)  |
|                                             |                                | Baby is alright (irrespective of developmental delays) |
|                                             |                                | Doctors communication                                  |
|                                             | Video consenting               | Anxiety of parents                                     |
|                                             |                                | Perception of treatment to be risky                    |
|                                             |                                | AV records sent to London                              |

## (B) Coding framework for professional's interview

| Root nodes               | Parent nodes                   | Child nodes                             |
|--------------------------|--------------------------------|-----------------------------------------|
| Preparation for trial    | Training                       | GCP certification                       |
|                          |                                | Role plays                              |
|                          |                                | Observation of consenting by seniors    |
|                          |                                | Documentation                           |
|                          |                                | Technical – operating Tecotherm machine |
| Consent process          | Parents profile                | Lower education levels                  |
|                          |                                | Poor socio-economic backgrounds         |
|                          |                                | Migrant labourers                       |
|                          | Declining consent              | Distance from trial sites               |
|                          | Queries from parents           | Survival of the baby                    |
|                          |                                | Long term effects                       |
|                          |                                | Cooling vs keeping baby warm            |
|                          |                                | Side effects                            |
| Presenting the trial     | Trial as a study               |                                         |
|                          | Presented as management system |                                         |
| Challenges in consenting | Time constraints               | Delay in referral                       |

|  |                                        |                                                                |
|--|----------------------------------------|----------------------------------------------------------------|
|  |                                        | Parents not available                                          |
|  |                                        | Night admissions                                               |
|  | Introducing the trial to parents       | Parents not understanding trial terms-randomisation, follow up |
|  |                                        | Parents bringing relatives, grand parents                      |
|  | Explaining to multiple family members  | Additional treatment facility                                  |
|  |                                        | Cooling as a definite therapy                                  |
|  | Information given by referral hospital | Explaining the concept of randomisation                        |
|  |                                        | Parent demanding cooling                                       |
|  | Randomisation                          | Parents anxiety                                                |
|  |                                        | Technical glitches                                             |
|  |                                        | Parents not available                                          |
|  |                                        | Repeat the same information in front of camera                 |

**(C) Coding scheme for observation of AV records**

| Root nodes            | Parent nodes                     | Child nodes                                                 |
|-----------------------|----------------------------------|-------------------------------------------------------------|
| Consent process       | Explanation of baby's condition  | Long term and short terms effects including mortality rates |
|                       | Introducing the trial            | Treatment from London                                       |
|                       |                                  | Standard of care in West                                    |
|                       |                                  | Free treatment                                              |
|                       |                                  | Follow up                                                   |
|                       |                                  | Travel assistance for follow up                             |
| Doctors communication | Use of medical terms and jargons | Encephalopathy                                              |
|                       |                                  | Hypothermia                                                 |
|                       |                                  | Randomisation                                               |
|                       | Reading from PIL                 | Sharing the PIL with parents                                |
|                       |                                  | Allowing time to read in case parents wish                  |
|                       | Cooling to be beneficial         | No side effects to mild side effects                        |
|                       |                                  | Baby will benefit from cooling                              |
|                       |                                  | Cost factors                                                |
| Parents participation | Emotional state                  | Distressed (crying )                                        |
|                       |                                  | Shocked                                                     |
|                       |                                  | Numb                                                        |
|                       | Queries and doubts               | Survival of the baby                                        |
|                       |                                  | Long term effects of cooling                                |
|                       |                                  | Follow up                                                   |
|                       | Mothers (female members)         | Passively listening                                         |
|                       |                                  | Seeking time to discuss with male members                   |
